# Supplementary material for: Combined ultrasound-guided cutting-needle biopsy and standard pleural biopsy for diagnosis of malignant pleural effusions
Source: BMC Pulm Med. 2016 Nov 17;16:155. doi: 10.1186/s12890-016-0318-x (PMC5114744; doi:10.1186/s12890-016-0318-x)
Supplement: Additional file 1: — Excel: Detailed results of CNB, SPB, CNB or SPB of the 17 2 UPE patients. (XLS 33 kb) [file 12890_2016_318_MOESM1_ESM.xls]

## Sheet: Sheet1
	Detailed results of CNB, SPB, CNB or SPB of the 172 UPE patients
No.	CNB	SPB	CNB or SPB	Definitive diagnosis
1	Adenocarcinoma	Adenocarcinoma	Adenocarcinoma	Adenocarcinoma
2	Adenocarcinoma	Adenocarcinoma	Adenocarcinoma	Adenocarcinoma
3	Inflammatory pleuritis	Inflammatory pleuritis	Inflammatory pleuritis	Inflammatory pleuritis
4	Tuberculosis pleuritis	Tuberculosis pleuritis	Tuberculosis pleuritis	Tuberculosis pleuritis
5	Mesothelioma	Mesothelioma	Mesothelioma	Mesothelioma
6	Fungus	Fungus	Fungus	Fungus
7	Inflammatory pleuritis	Inflammatory pleuritis	Inflammatory pleuritis	Inflammatory pleuritis
8	Adenocarcinoma	Adenocarcinoma	Adenocarcinoma	Adenocarcinoma
9	Chronic empyema	Squamous cell carcinoma	Squamous cell carcinoma	Squamous cell carcinoma
10	Tuberculosis pleuritis	Tuberculosis pleuritis	Tuberculosis pleuritis	Tuberculosis pleuritis
11	Inadequate material	Inflammatory pleuritis	Inflammatory pleuritis	Inflammatory pleuritis
12	Pleuritis fibrosis and plaques	Tuberculosis pleuritis	Tuberculosis pleuritis	Tuberculosis pleuritis
13	Inflammatory pleuritis	Inflammatory pleuritis	Inflammatory pleuritis	Inflammatory pleuritis
14	Squamous cell carcinoma	Chronic empyema	Squamous cell carcinoma	Squamous cell carcinoma
15	Chronic empyema	Chronic empyema	Chronic empyema	Chronic empyema
16	Adenocarcinoma	Adenocarcinoma	Adenocarcinoma	Adenocarcinoma
17	Pleuritis fibrosis and plaques	Pleuritis fibrosis and plaques	Pleuritis fibrosis and plaques	Pleuritis fibrosis and plaques
18	Inadequate material	Chronic empyema	Chronic empyema	Chronic empyema
19	Inflammatory pleuritis	Inflammatory pleuritis	Inflammatory pleuritis	Inflammatory pleuritis
20	Adenocarcinoma	Adenocarcinoma	Adenocarcinoma	Adenocarcinoma
21	Inflammatory pleuritis	Inflammatory pleuritis	Inflammatory pleuritis	Inflammatory pleuritis
22	Small lung cancer	Small lung cancer	Small lung cancer	Small lung cancer
23	Tuberculosis pleuritis	Tuberculosis pleuritis	Tuberculosis pleuritis	Tuberculosis pleuritis
24	Squamous cell carcinoma	Squamous cell carcinoma	Squamous cell carcinoma	Squamous cell carcinoma
25	Adenocarcinoma	Adenocarcinoma	Adenocarcinoma	Adenocarcinoma
26	Pleuritis fibrosis and plaques	Inadequate material	Pleuritis fibrosis and plaques	Pleuritis fibrosis and plaques
27	Inflammatory pleuritis	Inflammatory pleuritis	Inflammatory pleuritis	Inflammatory pleuritis
28	Inadequate material	Inflammatory pleuritis	Inflammatory pleuritis	Inflammatory pleuritis
29	Chronic empyema	Chronic empyema	Chronic empyema	Chronic empyema
30	Mesothelioma	Mesothelioma	Mesothelioma	Mesothelioma
31	Inflammatory pleuritis	Inflammatory pleuritis	Inflammatory pleuritis	Inflammatory pleuritis
32	Chronic empyema	Chronic empyema	Chronic empyema	Chronic empyema
33	Adenocarcinoma	Inflammatory pleuritis	Adenocarcinoma	Adenocarcinoma
34	Tuberculosis pleuritis	Tuberculosis pleuritis	Tuberculosis pleuritis	Tuberculosis pleuritis
35	Inflammatory pleuritis	Squamous cell carcinoma	Squamous cell carcinoma	Squamous cell carcinoma
36	Tuberculosis pleuritis	Tuberculosis pleuritis	Tuberculosis pleuritis	Tuberculosis pleuritis
37	Metastasis of breast cancer	Metastasis of breast cancer	Metastasis of breast cancer	Metastasis of breast cancer
38	Tuberculosis pleuritis	Tuberculosis pleuritis	Tuberculosis pleuritis	Tuberculosis pleuritis
39	Inflammatory pleuritis	Adenocarcinoma	Adenocarcinoma	Adenocarcinoma
40	Small lung cancer	Small lung cancer	Small lung cancer	Small lung cancer
41	Adenocarcinoma	Indeterminate-origin disease	Adenocarcinoma	Adenocarcinoma
42	Tuberculosis pleuritis	Tuberculosis pleuritis	Tuberculosis pleuritis	Tuberculosis pleuritis
43	Inadequate material	Inadequate material	Inadequate material	Inadequate material
44	Fungus	Indeterminate-origin disease	Fungus	Fungus
45	Tuberculosis pleuritis	Tuberculosis pleuritis	Tuberculosis pleuritis	Tuberculosis pleuritis
46	Mesothelioma	Mesothelioma	Mesothelioma	Mesothelioma
47	Indeterminate-origin disease	Indeterminate-origin disease	Indeterminate-origin disease	Indeterminate-origin disease
48	Small lung cancer	Small lung cancer	Small lung cancer	Small lung cancer
49	Adenocarcinoma	Adenocarcinoma	Adenocarcinoma	Adenocarcinoma
50	Tuberculosis pleuritis	Tuberculosis pleuritis	Tuberculosis pleuritis	Tuberculosis pleuritis
51	Tuberculosis pleuritis	Tuberculosis pleuritis	Tuberculosis pleuritis	Tuberculosis pleuritis
52	Inflammatory pleuritis	Tuberculosis pleuritis	Tuberculosis pleuritis	Tuberculosis pleuritis
53	Pleuritis fibrosis and plaques	Pleuritis fibrosis and plaques	Pleuritis fibrosis and plaques	Pleuritis fibrosis and plaques
54	Inadequate material	Adenocarcinoma	Adenocarcinoma	Adenocarcinoma
55	Indeterminate-origin disease	Indeterminate-origin disease	Indeterminate-origin disease	Indeterminate-origin disease
56	Tuberculosis pleuritis	Tuberculosis pleuritis	Tuberculosis pleuritis	Tuberculosis pleuritis
57	Indeterminate-origin disease	Adenocarcinoma	Adenocarcinoma	Adenocarcinoma
58	Inflammatory pleuritis	Inflammatory pleuritis	Inflammatory pleuritis	Mesothelioma
59	Tuberculosis pleuritis	Inflammatory pleuritis	Tuberculosis pleuritis	Tuberculosis pleuritis
60	Small lung cancer	Small lung cancer	Small lung cancer	Small lung cancer
61	Tuberculosis pleuritis	Tuberculosis pleuritis	Tuberculosis pleuritis	Tuberculosis pleuritis
62	Tuberculosis pleuritis	Tuberculosis pleuritis	Tuberculosis pleuritis	Tuberculosis pleuritis
63	Small lung cancer	Inflammatory pleuritis	Small lung cancer	Small lung cancer
64	Lymphoma	Inadequate material	Lymphoma	Lymphoma
65	Inflammatory pleuritis	Adenocarcinoma	Adenocarcinoma	Adenocarcinoma
66	Indeterminate-origin disease	Inflammatory pleuritis	Inflammatory pleuritis	Inflammatory pleuritis
67	Adenocarcinoma	Adenocarcinoma	Adenocarcinoma	Adenocarcinoma
68	Indeterminate-origin disease	Inflammatory pleuritis	Inflammatory pleuritis	Inflammatory pleuritis
69	Tuberculosis pleuritis	Tuberculosis pleuritis	Tuberculosis pleuritis	Tuberculosis pleuritis
70	Inadequate material	Inadequate material	Inadequate material	Lymphoma
71	Chronic empyema	Small lung cancer	Small lung cancer	Small lung cancer
72	Tuberculosis pleuritis	Indeterminate-origin disease	Tuberculosis pleuritis	Tuberculosis pleuritis
73	Inflammatory pleuritis	Inflammatory pleuritis	Inflammatory pleuritis	Inflammatory pleuritis
74	Tuberculosis pleuritis	Tuberculosis pleuritis	Tuberculosis pleuritis	Tuberculosis pleuritis
75	Indeterminate-origin disease	Adenocarcinoma	Adenocarcinoma	Adenocarcinoma
76	Indeterminate-origin disease	Inadequate material	Indeterminate-origin disease	Indeterminate-origin disease
77	Tuberculosis pleuritis	Tuberculosis pleuritis	Tuberculosis pleuritis	Tuberculosis pleuritis
78	Indeterminate-origin disease	Metastasis of breast cancer	Metastasis of breast cancer	Metastasis of breast cancer
79	Tuberculosis pleuritis	Tuberculosis pleuritis	Tuberculosis pleuritis	Tuberculosis pleuritis
80	Undifferentiatd cell carcinoma	Undifferentiatd cell carcinoma	Undifferentiatd cell carcinoma	Undifferentiatd cell carcinoma
81	Tuberculosis pleuritis	Tuberculosis pleuritis	Tuberculosis pleuritis	Tuberculosis pleuritis
82	Inadequate material	Undifferentiatd cell carcinoma	Undifferentiatd cell carcinoma	Undifferentiatd cell carcinoma
83	Indeterminate-origin disease	Adenocarcinoma	Adenocarcinoma	Adenocarcinoma
84	Squamous cell carcinoma	Squamous cell carcinoma	Squamous cell carcinoma	Squamous cell carcinoma
85	Tuberculosis pleuritis	Tuberculosis pleuritis	Tuberculosis pleuritis	Tuberculosis pleuritis
86	Inadequate material	Small lung cancer	Small lung cancer	Small lung cancer
87	Indeterminate-origin disease	Adenocarcinoma	Adenocarcinoma	Adenocarcinoma
88	Indeterminate-origin disease	Inadequate material	Indeterminate-origin disease	Indeterminate-origin disease
89	Tuberculosis pleuritis	Tuberculosis pleuritis	Tuberculosis pleuritis	Tuberculosis pleuritis
90	Chronic empyema	Small lung cancer	Small lung cancer	Small lung cancer
91	Tuberculosis pleuritis	Tuberculosis pleuritis	Tuberculosis pleuritis	Tuberculosis pleuritis
92	Tuberculosis pleuritis	Tuberculosis pleuritis	Tuberculosis pleuritis	Tuberculosis pleuritis
93	Fungus	Indeterminate-origin disease	Fungus	Fungus
94	Indeterminate-origin disease	Adenocarcinoma	Adenocarcinoma	Adenocarcinoma
95	Tuberculosis pleuritis	Indeterminate-origin disease	Tuberculosis pleuritis	Tuberculosis pleuritis
96	Inflammatory pleuritis	Inflammatory pleuritis	Inflammatory pleuritis	Inflammatory pleuritis
97	Tuberculosis pleuritis	Tuberculosis pleuritis	Tuberculosis pleuritis	Tuberculosis pleuritis
98	Squamous cell carcinoma	Squamous cell carcinoma	Squamous cell carcinoma	Squamous cell carcinoma
99	Tuberculosis pleuritis	Tuberculosis pleuritis	Tuberculosis pleuritis	Tuberculosis pleuritis
100	Inadequate material	Small lung cancer	Small lung cancer	Small lung cancer
101	Tuberculosis pleuritis	Inflammatory pleuritis	Tuberculosis pleuritis	Tuberculosis pleuritis
102	Inadequate material	Inadequate material	Inadequate material	Lymphoma
103	Tuberculosis pleuritis	Tuberculosis pleuritis	Tuberculosis pleuritis	Tuberculosis pleuritis
104	Adenocarcinoma	Adenocarcinoma	Adenocarcinoma	Adenocarcinoma
105	Adenocarcinoma	Adenocarcinoma	Adenocarcinoma	Adenocarcinoma
106	Tuberculosis pleuritis	Tuberculosis pleuritis	Tuberculosis pleuritis	Tuberculosis pleuritis
107	Small lung cancer	Inflammatory pleuritis	Small lung cancer	Small lung cancer
108	Lymphoma	Inadequate material	Lymphoma	Lymphoma
109	Small lung cancer	Small lung cancer	Small lung cancer	Small lung cancer
110	Tuberculosis pleuritis	Tuberculosis pleuritis	Tuberculosis pleuritis	Tuberculosis pleuritis
111	Tuberculosis pleuritis	Tuberculosis pleuritis	Tuberculosis pleuritis	Tuberculosis pleuritis
112	Inadequate material	Undifferentiatd cell carcinoma	Undifferentiatd cell carcinoma	Undifferentiatd cell carcinoma
113	Inflammatory pleuritis	Tuberculosis pleuritis	Tuberculosis pleuritis	Tuberculosis pleuritis
114	Tuberculosis pleuritis	Tuberculosis pleuritis	Tuberculosis pleuritis	Tuberculosis pleuritis
115	Small lung cancer	Small lung cancer	Small lung cancer	Small lung cancer
116	Inflammatory pleuritis	Inflammatory pleuritis	Inflammatory pleuritis	Inflammatory pleuritis
117	Adenocarcinoma	Adenocarcinoma	Adenocarcinoma	Adenocarcinoma
118	Inflammatory pleuritis	Adenocarcinoma	Adenocarcinoma	Adenocarcinoma
119	Indeterminate-origin disease	Inflammatory pleuritis	Inflammatory pleuritis	Inflammatory pleuritis
120	Chronic empyema	Squamous cell carcinoma	Squamous cell carcinoma	Squamous cell carcinoma
121	Mesothelioma	Mesothelioma	Mesothelioma	Mesothelioma
122	Tuberculosis pleuritis	Tuberculosis pleuritis	Tuberculosis pleuritis	Tuberculosis pleuritis
123	Inflammatory pleuritis	Inflammatory pleuritis	Inflammatory pleuritis	Inflammatory pleuritis
124	Squamous cell carcinoma	Chronic empyema	Squamous cell carcinoma	Squamous cell carcinoma
125	Inadequate material	Inflammatory pleuritis	Inflammatory pleuritis	Inflammatory pleuritis
126	Pleuritis fibrosis and plaques	Tuberculosis pleuritis	Tuberculosis pleuritis	Tuberculosis pleuritis
127	Inflammatory pleuritis	Inflammatory pleuritis	Inflammatory pleuritis	Inflammatory pleuritis
128	Mesothelioma	Mesothelioma	Mesothelioma	Mesothelioma
129	Indeterminate-origin disease	Indeterminate-origin disease	Indeterminate-origin disease	Indeterminate-origin disease
130	Mesothelioma	Mesothelioma	Mesothelioma	Mesothelioma
131	Inflammatory pleuritis	Inflammatory pleuritis	Inflammatory pleuritis	Inflammatory pleuritis
132	Inflammatory pleuritis	Inflammatory pleuritis	Inflammatory pleuritis	Mesothelioma
133	Adenocarcinoma	Inflammatory pleuritis	Adenocarcinoma	Adenocarcinoma
134	Tuberculosis pleuritis	Tuberculosis pleuritis	Tuberculosis pleuritis	Tuberculosis pleuritis
135	Inflammatory pleuritis	Squamous cell carcinoma	Squamous cell carcinoma	Squamous cell carcinoma
136	Tuberculosis pleuritis	Tuberculosis pleuritis	Tuberculosis pleuritis	Tuberculosis pleuritis
137	Chronic empyema	Chronic empyema	Chronic empyema	Chronic empyema
138	Tuberculosis pleuritis	Tuberculosis pleuritis	Tuberculosis pleuritis	Tuberculosis pleuritis
139	Adenocarcinoma	Adenocarcinoma	Adenocarcinoma	Adenocarcinoma
140	Tuberculosis pleuritis	Tuberculosis pleuritis	Tuberculosis pleuritis	Tuberculosis pleuritis
141	Squamous cell carcinoma	Squamous cell carcinoma	Squamous cell carcinoma	Squamous cell carcinoma
142	Chronic empyema	Chronic empyema	Chronic empyema	Chronic empyema
143	Inadequate material	Adenocarcinoma	Adenocarcinoma	Adenocarcinoma
144	Indeterminate-origin disease	Indeterminate-origin disease	Indeterminate-origin disease	Indeterminate-origin disease
145	Adenocarcinoma	Adenocarcinoma	Adenocarcinoma	Adenocarcinoma
146	Pleuritis fibrosis and plaques	Inadequate material	Pleuritis fibrosis and plaques	Pleuritis fibrosis and plaques
147	Chronic empyema	Chronic empyema	Chronic empyema	Chronic empyema
148	Inflammatory pleuritis	Inflammatory pleuritis	Inflammatory pleuritis	Inflammatory pleuritis
149	Adenocarcinoma	Adenocarcinoma	Adenocarcinoma	Adenocarcinoma
150	Indeterminate-origin disease	Metastasis of breast cancer	Metastasis of breast cancer	Metastasis of breast cancer
151	Tuberculosis pleuritis	Tuberculosis pleuritis	Tuberculosis pleuritis	Tuberculosis pleuritis
152	Undifferentiatd cell carcinoma	Undifferentiatd cell carcinoma	Undifferentiatd cell carcinoma	Undifferentiatd cell carcinoma
153	Metastasis of breast cancer	Metastasis of breast cancer	Metastasis of breast cancer	Metastasis of breast cancer
154	Fungus	Fungus	Fungus	Fungus
155	Adenocarcinoma	Indeterminate-origin disease	Adenocarcinoma	Adenocarcinoma
156	Pleuritis fibrosis and plaques	Pleuritis fibrosis and plaques	Pleuritis fibrosis and plaques	Pleuritis fibrosis and plaques
157	Inadequate material	Inadequate material	Inadequate material	Inadequate material
158	Inflammatory pleuritis	Adenocarcinoma	Adenocarcinoma	Adenocarcinoma
159	Small lung cancer	Small lung cancer	Small lung cancer	Small lung cancer
160	Tuberculosis pleuritis	Tuberculosis pleuritis	Tuberculosis pleuritis	Tuberculosis pleuritis
161	Small lung cancer	Small lung cancer	Small lung cancer	Small lung cancer
162	Tuberculosis pleuritis	Tuberculosis pleuritis	Tuberculosis pleuritis	Tuberculosis pleuritis
163	Adenocarcinoma	Adenocarcinoma	Adenocarcinoma	Adenocarcinoma
164	Pleuritis fibrosis and plaques	Pleuritis fibrosis and plaques	Pleuritis fibrosis and plaques	Pleuritis fibrosis and plaques
165	Inadequate material	Chronic empyema	Chronic empyema	Chronic empyema
166	Tuberculosis pleuritis	Tuberculosis pleuritis	Tuberculosis pleuritis	Tuberculosis pleuritis
167	Indeterminate-origin disease	Adenocarcinoma	Adenocarcinoma	Adenocarcinoma
168	Adenocarcinoma	Adenocarcinoma	Adenocarcinoma	Adenocarcinoma
169	Indeterminate-origin disease	Inflammatory pleuritis	Inflammatory pleuritis	Inflammatory pleuritis
170	Inflammatory pleuritis	Inflammatory pleuritis	Inflammatory pleuritis	Inflammatory pleuritis
171	Inadequate material	Inflammatory pleuritis	Inflammatory pleuritis	Inflammatory pleuritis
172	Inflammatory pleuritis	Inflammatory pleuritis	Inflammatory pleuritis	Inflammatory pleuritis
